# Supplementary material for: Special catalytic effects of intermediate-water for rapid shock initiation of β-HMX
Source: Royal Society of Chemistry journal article supplement (doi:10.1039/c6ra21384g), 2016-01-01
Supplement: c6ra21384g1.pdf [file c6ra21384g1.pdf]

## Supplementary materials

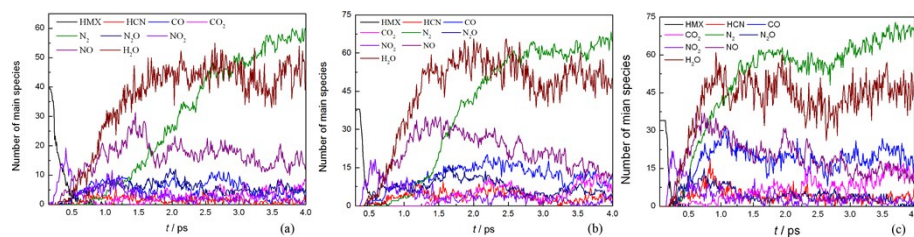

Fig. S1 Main species evolution involved in HMX decomposition: (a) perfect model, (b) model with two-molecule vacancy, (c) model with six-molecule vacancy

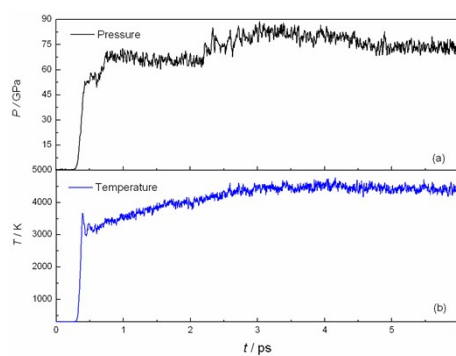

Fig. S2 Temperature and Pressure evolutions of HMX decomposition system

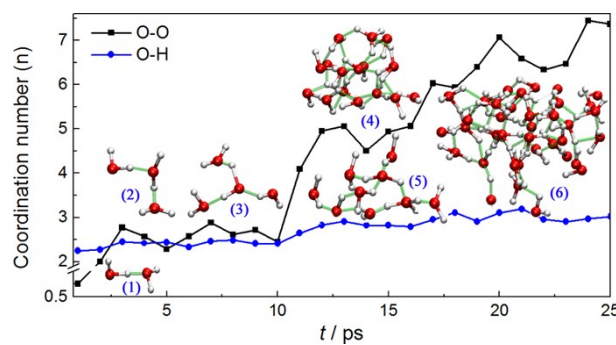

Fig. 3S Coordination number and corresponding typical structures of intermediate-water (green line represented the quasi hydrogen-bonds)
